# Supplementary material for: Effect of Sr2+ ions on the structure, up-conversion emission and thermal sensing of Er3+, Yb3+ co-doped double perovskite Ba(2−x)SrxMgWO6 phosphors
Source: Royal Society of Chemistry journal article supplement (doi:10.1039/d2cp05190g), 2023-01-01
Supplement: d2cp05190g1.pdf [file d2cp05190g1.pdf]

## Effect of Sr<sup>2+</sup> ions on the structure, upconversion emission and thermal sensing of Er<sup>3+</sup>, Yb<sup>3+</sup> codoped double perovskites Ba<sub>(2-x)</sub>Sr<sub>x</sub>MgWO<sub>6</sub> phosphors

Guoyi Dong<sup>1</sup>, Kexin Zhang<sup>1</sup>, Mengrui Dong<sup>1</sup>, Xiangxiang Li<sup>1</sup>, Zhenyang Liu<sup>1</sup>,  
Lei Zhang<sup>2\*</sup>, Nian Fu<sup>1\*</sup>, Li Guan, Xu Li<sup>1</sup>, Fenghe Wang<sup>1\*</sup>

<sup>1</sup> Hebei Key Laboratory of Photo-Electricity Information and Materials, College of Physics Science and Technology, Hebei University, Baoding 071002, PR China

<sup>2</sup> Hebei Key Laboratory of Optoelectronic Information and Geo-detection Technology, Hebei GEO University, Shijiazhuang, China 050031

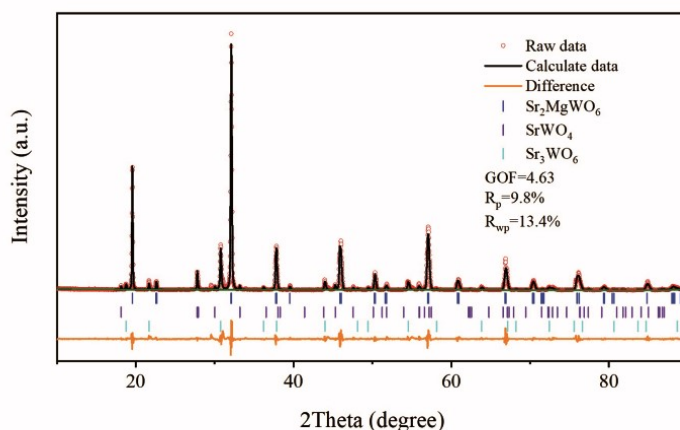

**Supplementary Fig. S1.** Rietveld refined XRD pattern of the Sr<sub>2</sub>MgWO<sub>6</sub>:7%Er<sup>3+</sup>, 2%Yb<sup>3+</sup>, 9%K<sup>+</sup>

\* Corresponding author: [funian@hbu.edu.cn](mailto:funian@hbu.edu.cn) (N. Fu); [zzll1012@163.com](mailto:zzll1012@163.com) (L. Zhang); [fenghe\\_wang@hotmail.com](mailto:fenghe_wang@hotmail.com) (F. H. Wang)

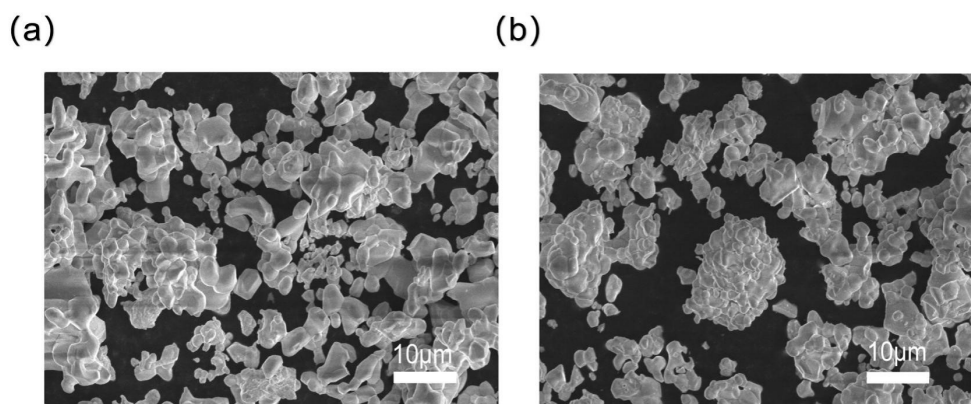

**Supplementary Fig. S2.** SEM images of (a)  $\text{Ba}_2\text{MgWO}_6:7\%\text{Er}^{3+}, 2\%\text{Yb}^{3+}, 9\%\text{K}^+$  and (b)  $\text{Sr}_2\text{MgWO}_6:7\%\text{Er}^{3+}, 2\%\text{Yb}^{3+}, 9\%\text{K}^+$

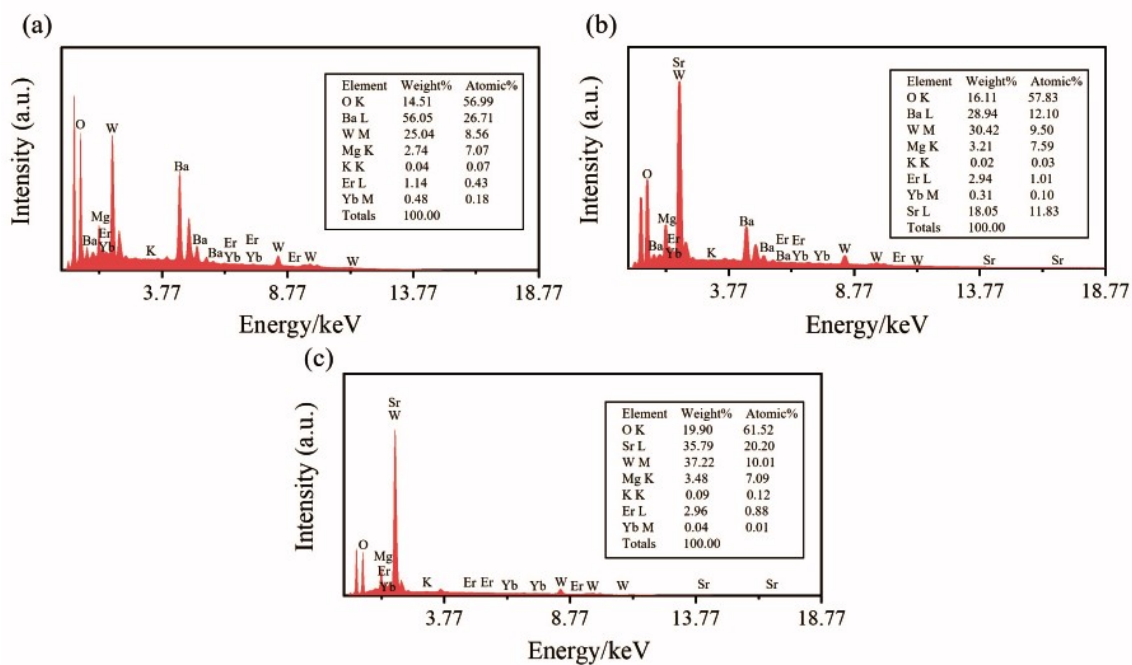

**Supplementary Fig. S3.** (a-c) EDS of the  $\text{Ba}_{2-x}\text{Sr}_x\text{MgWO}_6:7\%\text{Er}^{3+}, 2\%\text{Yb}^{3+}, 9\%\text{K}^+$  ( $x=0,1,2$ )

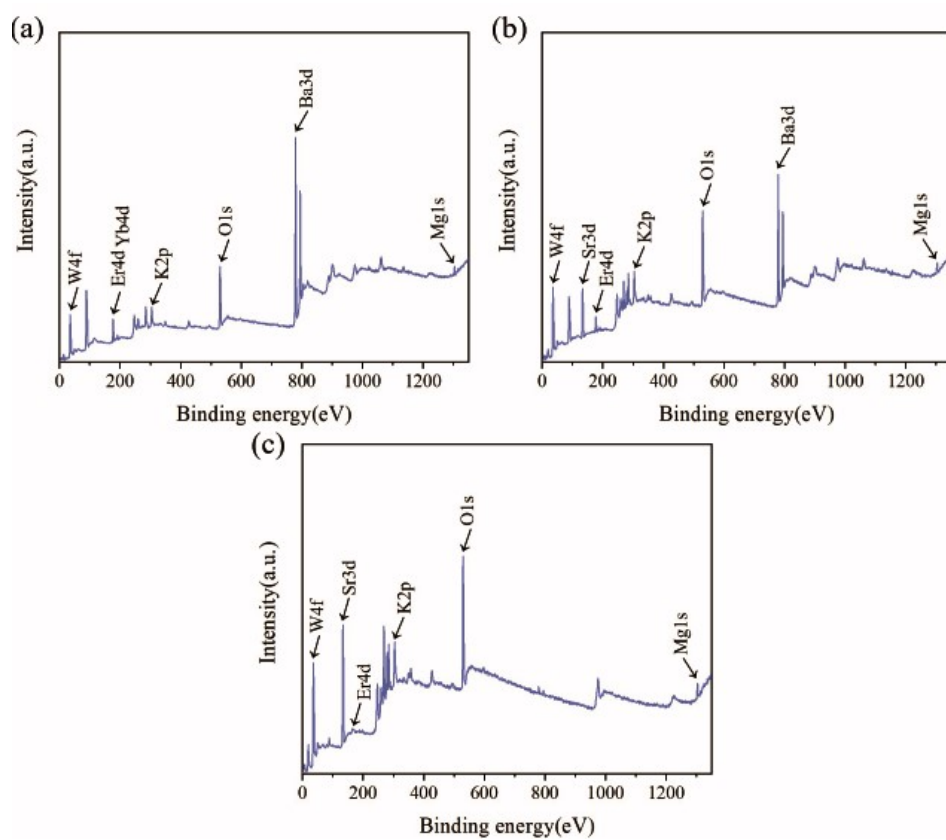

**Supplementary Fig. S4.** (a-c) XPS spectra of  $\text{Ba}_{2-x}\text{Sr}_x\text{MgWO}_6:7\%\text{Er}^{3+}, 2\%\text{Yb}^{3+}, 9\%\text{K}^+$  ( $x=0,1,2$ )

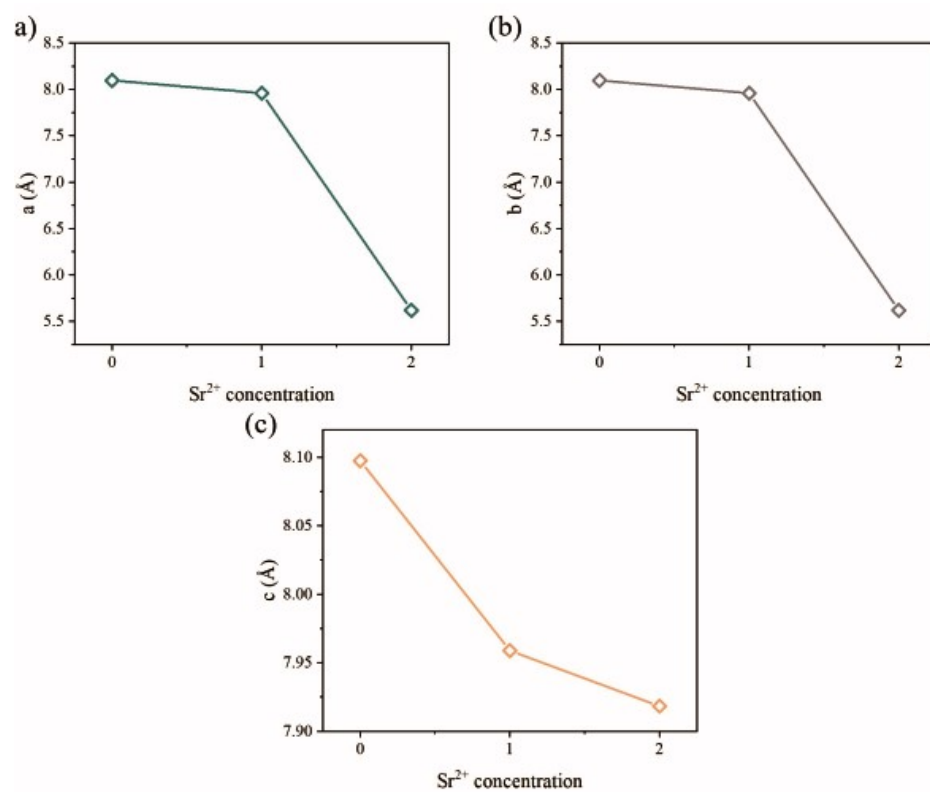

**Supplementary Fig. S5.** (a-c) Effect of changing Sr<sup>2+</sup> doping concentration on cell parameters

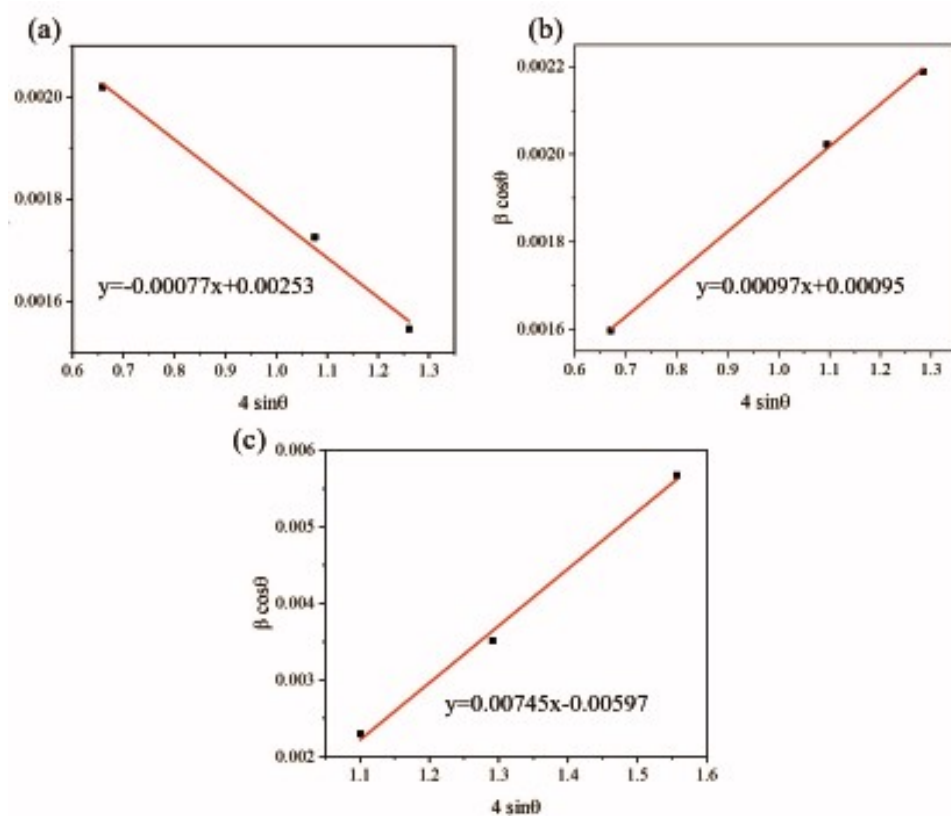

**Supplementary Fig. S6.** (a-c) Williamson-Hall plot of  $\text{Ba}_{2-x}\text{Sr}_x\text{MgWO}_6:7\%\text{Er}^{3+}, 2\%\text{Yb}^{3+}, 9\%\text{K}^+$  ( $x=0,1,2$ )

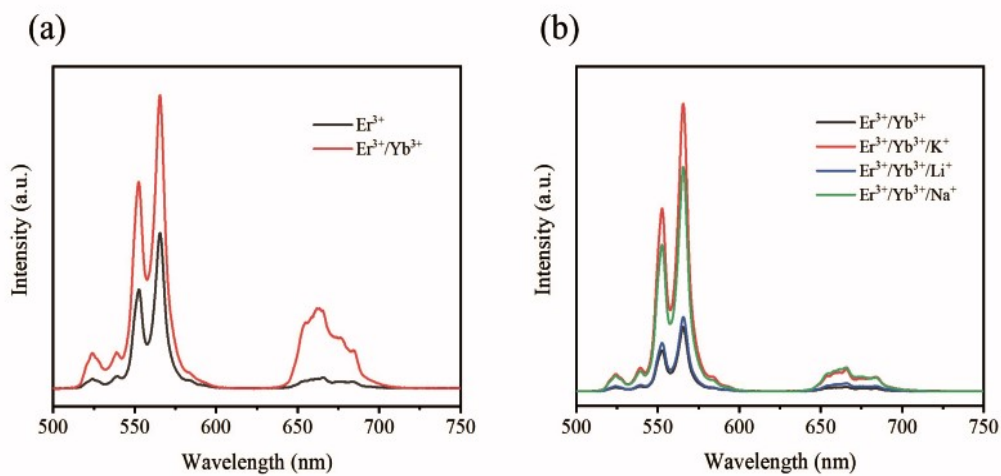

**Supplementary Fig. S7.** Upconversion emission spectra of (a)  $\text{Sr}_2\text{Mg}_{0.93}\text{WO}_6:7\%\text{Er}^{3+}$ ,  $\text{Sr}_2\text{Mg}_{0.91}\text{WO}_6:7\%\text{Er}^{3+}$ , 2% $\text{Yb}^{3+}$ ; (b)  $\text{Sr}_2\text{Mg}_{0.91}\text{WO}_6:7\%\text{Er}^{3+}$ , 2% $\text{Yb}^{3+}$ ,  $\text{Sr}_2\text{Mg}_{0.91}\text{WO}_6:7\%\text{Er}^{3+}$ , 2% $\text{Yb}^{3+}$ , 9% $\text{A}^+$  ( $\text{A} = \text{K}^+, \text{Li}^+, \text{Na}^+$ )

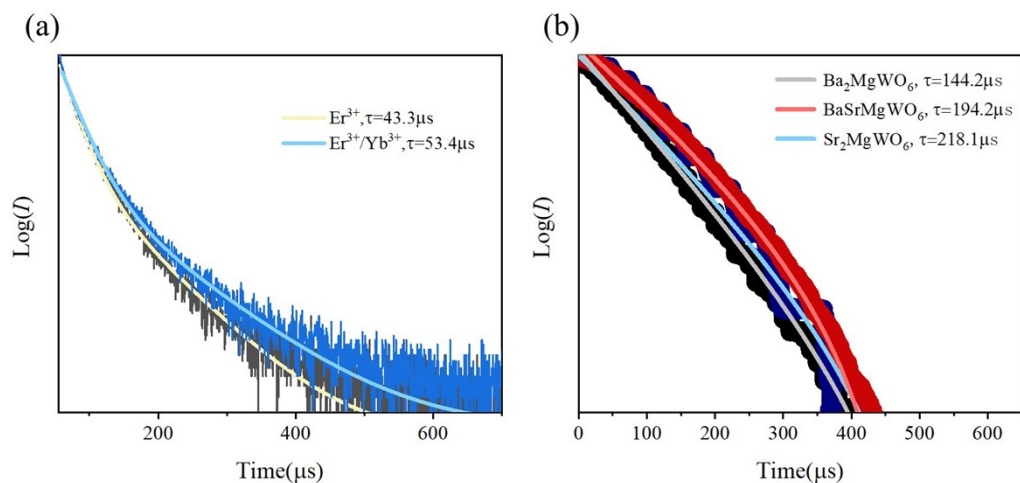

**Supplementary Fig. S8.** Luminescence decay curves of (a)  $\text{Sr}_2\text{Mg}_{0.93}\text{WO}_6:7\%\text{Er}^{3+}$ ,  $\text{Sr}_2\text{Mg}_{0.91}\text{WO}_6:7\%\text{Er}^{3+}$ , 2% $\text{Yb}^{3+}$  (b)  $\text{Ba}_{(2-x)}\text{Sr}_x\text{MgWO}_6$  ( $x=0, 1, 2$ ):7% $\text{Er}^{3+}$ , 2% $\text{Yb}^{3+}$ , 9% $\text{K}^+$

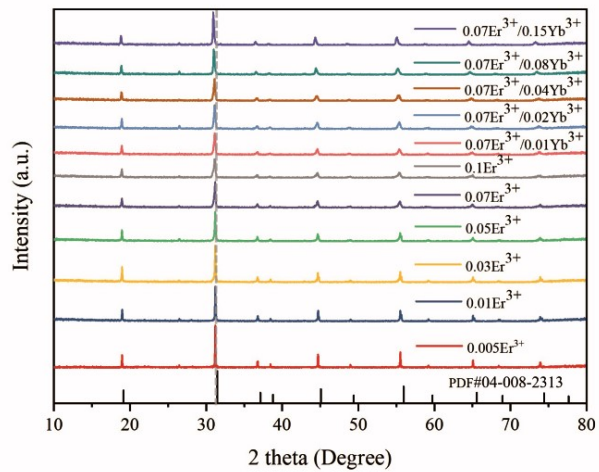

**Supplementary Fig. S9.** XRD sample of  $\text{Sr}_2\text{Mg}_{1-m}\text{WO}_6: m\%\text{Er}^{3+}; \text{Sr}_2\text{Mg}_{0.93-n}\text{WO}_6: 7\%\text{Er}^{3+}/n\%\text{Yb}^{3+}$  ( $m = 0.05, 1, 3, 5, 7, 10/n = 1, 2, 4, 8, 15$ )

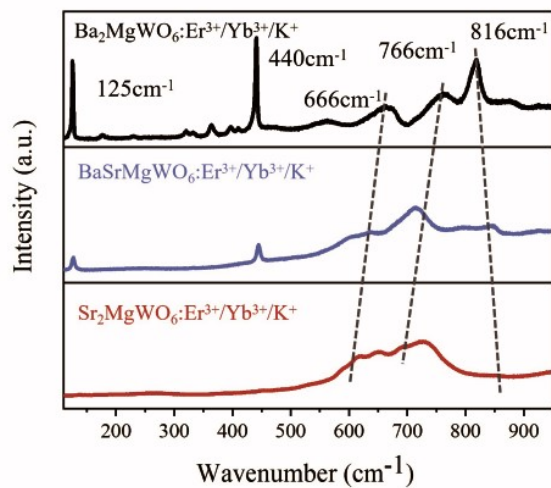

**Supplementary Fig. S10.** Raman spectra of  $\text{Ba}_{2-x}\text{Sr}_x\text{MgWO}_6:7\%\text{Er}^{3+}, 2\%\text{Yb}^{3+}, 9\%\text{K}^+$  ( $x=0, 1, 2$ )

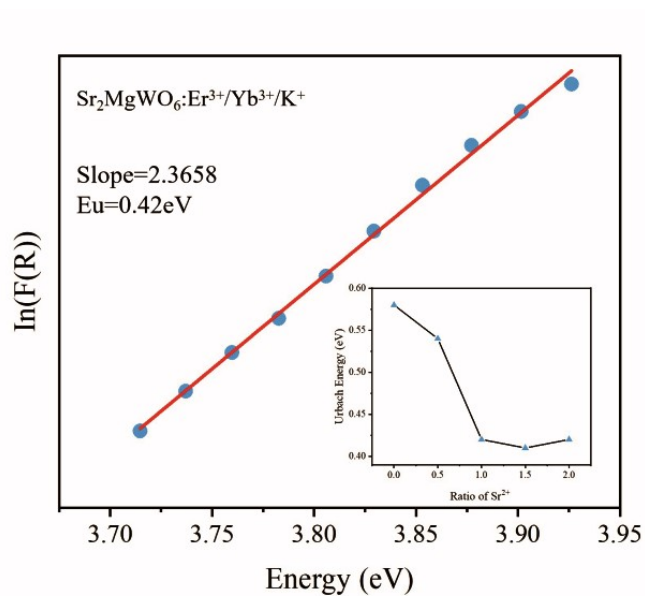

**Supplementary Fig. S11.** Kubelka-Munk plot  $\ln(F(R))$  vs. energy plot of  $\text{Sr}_2\text{MgWO}_6:7\%\text{Er}^{3+}, 2\%\text{Yb}^{3+}, 9\%\text{K}^+$ , Inset shows urbach energy plot of  $\text{Ba}_{2-x}\text{Sr}_x\text{MgWO}_6:7\%\text{Er}^{3+}, 2\%\text{Yb}^{3+}, 9\%\text{K}^+$  ( $x=0, 0.5, 1, 1.5, 2$ )



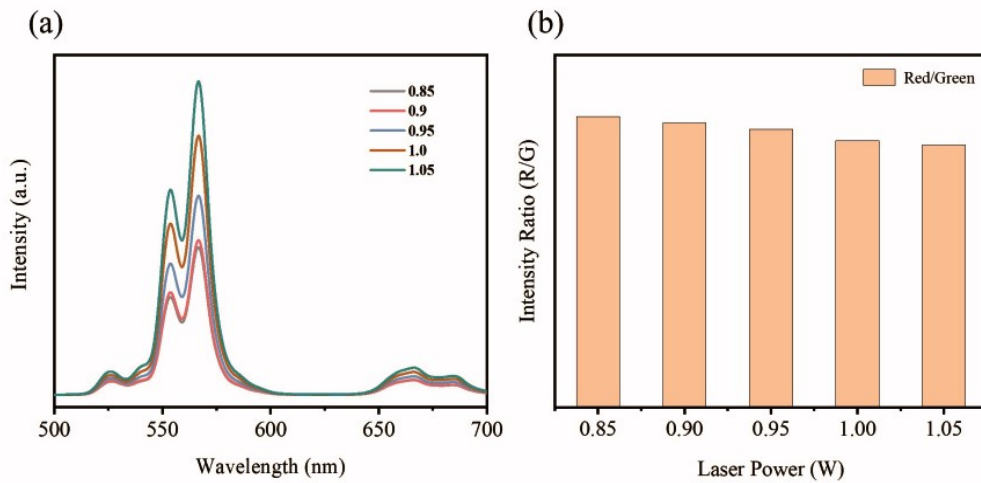

**Supplementary Fig. S12.** (a) Power-dependent spectra of  $\text{Sr}_2\text{MgWO}_6:7\%\text{Er}^{3+}$ ,  $2\%\text{Yb}^{3+}$ ,  $9\%\text{K}^+$ , (b) Red to green ratio of  $\text{Sr}_2\text{MgWO}_6:7\%\text{Er}^{3+}$ ,  $2\%\text{Yb}^{3+}$ ,  $9\%\text{K}^+$  emission peak with laser power

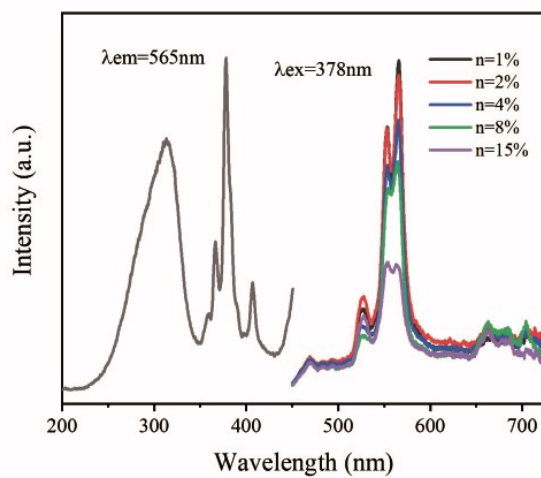

**Supplementary Fig. S13.** PLE spectrum ( $\lambda_{\text{em}} = 565\text{ nm}$ ) of  $7\text{ mol}\%\text{Er}^{3+}$ ,  $2\text{ mol}\%\text{Yb}^{3+}$ :  $\text{Sr}_2\text{MgWO}_6$  and PL spectra ( $\lambda_{\text{ex}} = 378\text{ nm}$ ) of  $2\text{ mol}\%\text{Er}^{3+}$ ,  $n\text{ mol}\%\text{Yb}^{3+}$ :  $\text{Sr}_2\text{MgWO}_6$  ( $n = 1, 2, 4, 8, 15$ ).

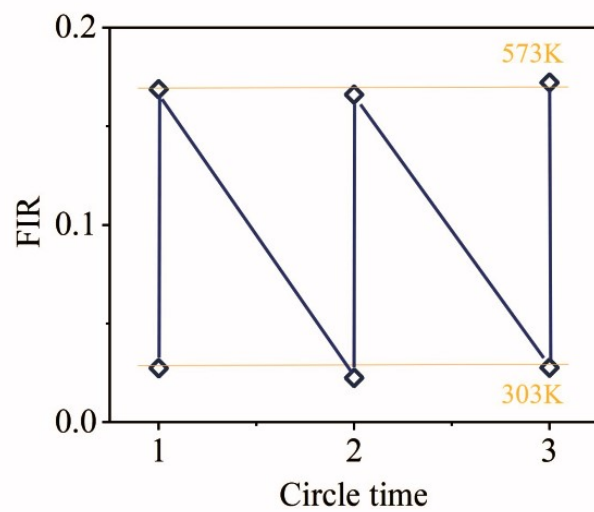

**Supplementary Fig. S14.** Changes in FIR (I527 nm/I553 nm) values for repeated tests between 303 K and 573 K
